# Supplementary figures and images for: Playing With Fear: A Field Study in Recreational Horror
Source: PubMed Central journal article supplement — Psychol Sci. 2020 Nov 2;31(12):1497–510. doi: 10.1177/0956797620972116 (PMC7734554; doi:10.1177/0956797620972116), 2020-11-02

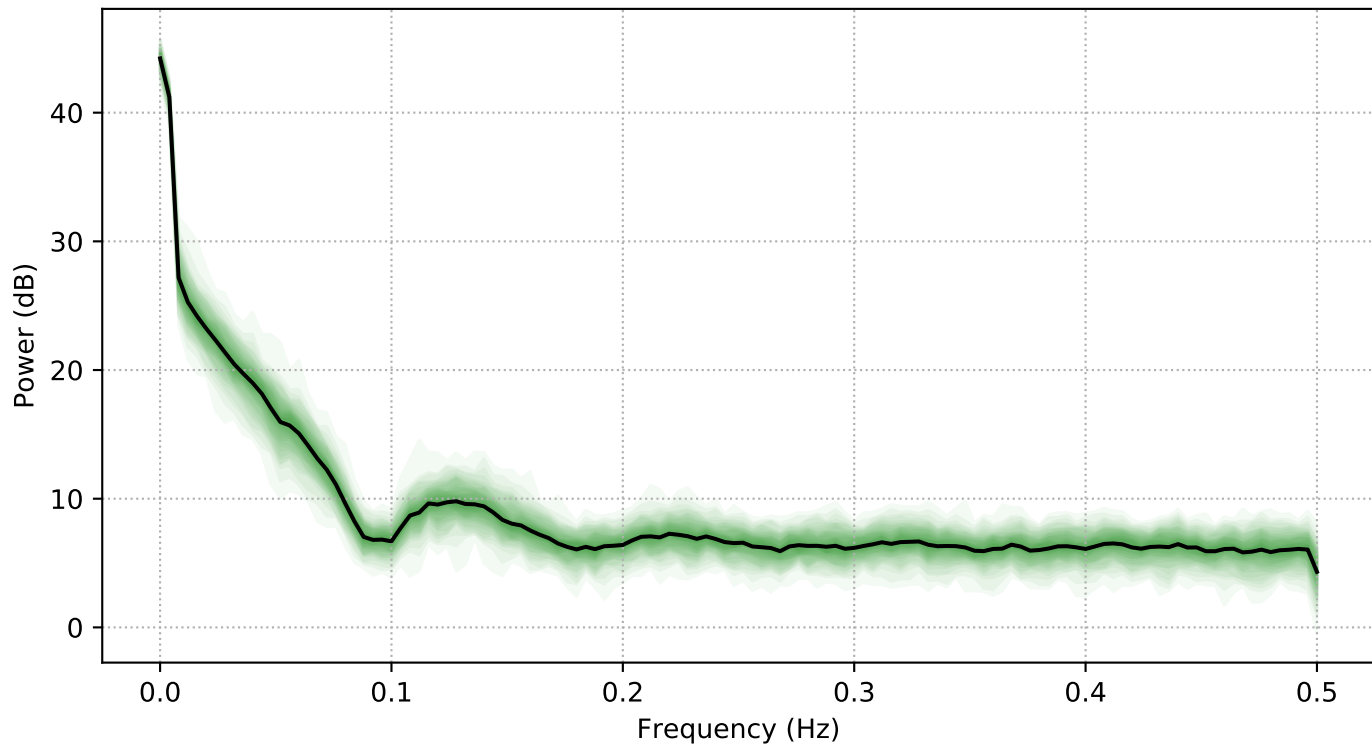

Supplement: Andersen_FigS1.pdf [file Andersen_FigS1.pdf]
